# Supplementary material for: An intrinsically semi-permeable PDMS nanosheet encapsulating adipose tissue-derived stem cells for enhanced angiogenesis
Source: Royal Society of Chemistry journal article supplement (doi:10.1039/d4bm00460d), 2024-01-01
Supplement: d4bm00460d1.pdf [file d4bm00460d1.pdf]

*Electronic Supplementary Information*

# Intrinsically Semi-Permeable PDMS Nanosheet Encapsulating Adipose Tissue-Derived Stem Cells for Enhanced Angiogenesis

*Megumi Takuma*<sup>1</sup>, *Hajime Fujita*<sup>1</sup>, *Nanami Zushi*<sup>1</sup>, *Hisato Nagano*<sup>2</sup>, *Ryuichi Azuma*<sup>2</sup>,  
*Tomoharu Kiyosawa*<sup>2</sup>, *Toshinori Fujie*<sup>1,3</sup>

<sup>1</sup>School of Life Science and Technology, Tokyo Institute of Technology, B-50, 4259 Nagatsuta-cho, Midori-ku, Yokohama 226-8501 (Japan). <sup>2</sup>Department of Plastic and Reconstructive Surgery, National Defense Medical College, Tokorozawa, Saitama 359-8513 (Japan). <sup>3</sup>Living Systems Materialogy Research Group, International Research Frontiers Initiative, Tokyo Institute of Technology

\*Corresponding author:

T. F: [t\\_fujie@bio.titech.ac.jp](mailto:t_fujie@bio.titech.ac.jp), Tel: +81-45-924-5712

This file includes:

Supporting Figures S1 to S3

Supporting Table S1

## Supporting figures and table

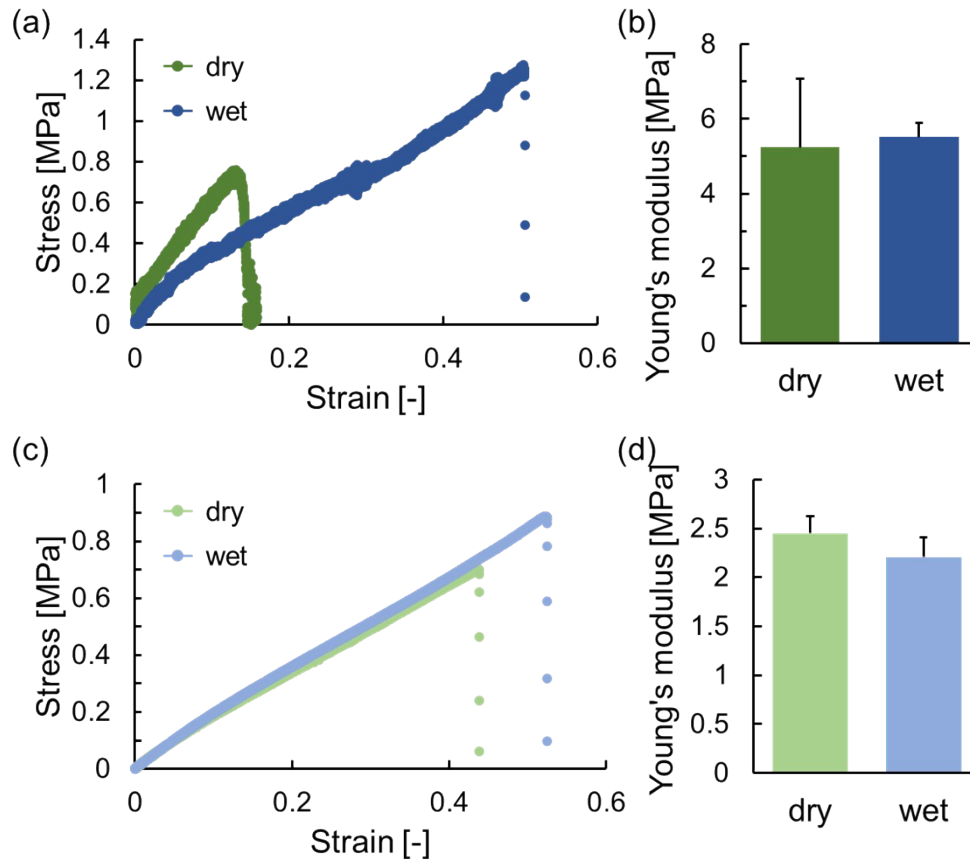

**Figure S1.** (a) Stress–strain curves of PDMS sheet (thickness: 2  $\mu\text{m}$ ) under dry and wet conditions. (b) Young’s modulus of PDMS sheet (thickness: 2  $\mu\text{m}$ ) under dry and wet conditions. (c) Stress–strain curves of PDMS sheet (thickness: 100  $\mu\text{m}$ ) under dry and wet conditions. (d) Young’s modulus of PDMS sheet (thickness: 100  $\mu\text{m}$ ) under dry and wet conditions.

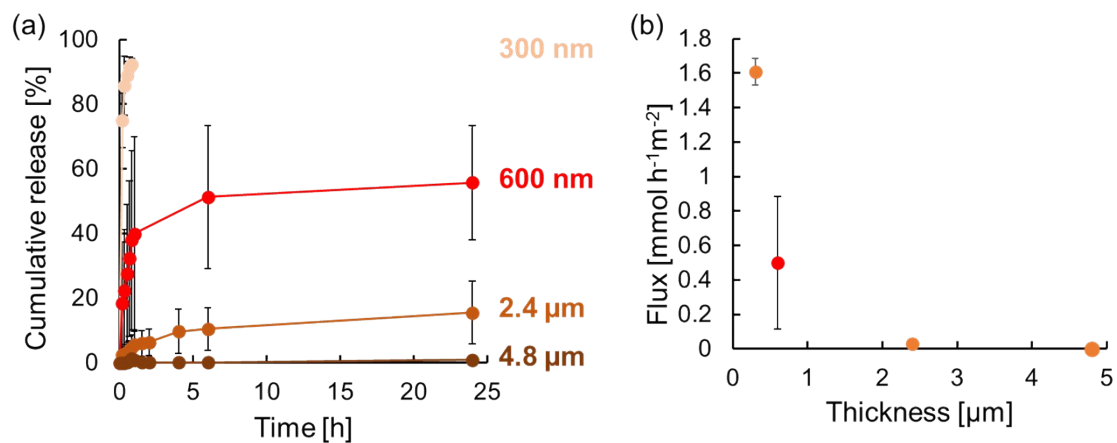

**Figure S2.** (a) Time-course study of the cumulative release of BSA through PDMS nanosheets with different thicknesses (pink: 300 nm, red: 600 nm, light brown: 2.4 μm, brown: 4.8 μm), and (b) corresponding relationship between the nanosheet thickness and flux. The data about 600 nm, 2.4 μm and 4.8 μm are retrieved from Figure 3.

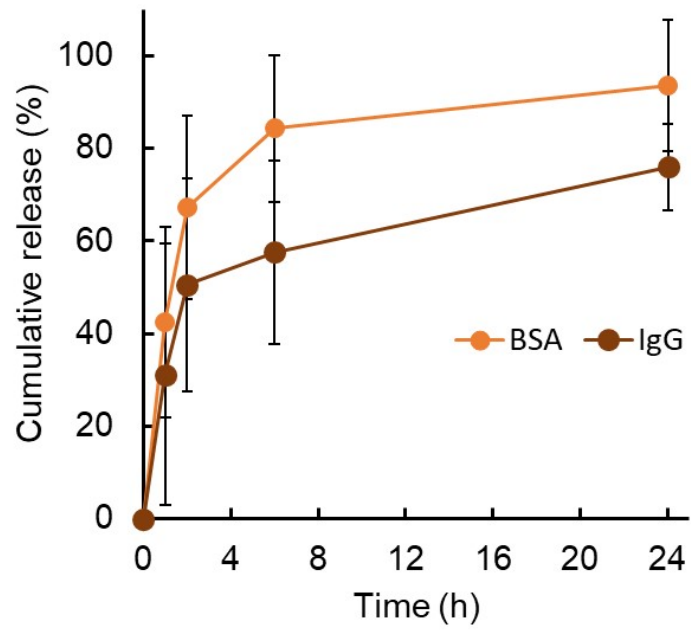

**Figure S3.** Time-course study of the cumulative release of FITC-BSA (orange) and FITC-IgG (brown) through PDMS nanosheet with thicknesses of 800 nm.

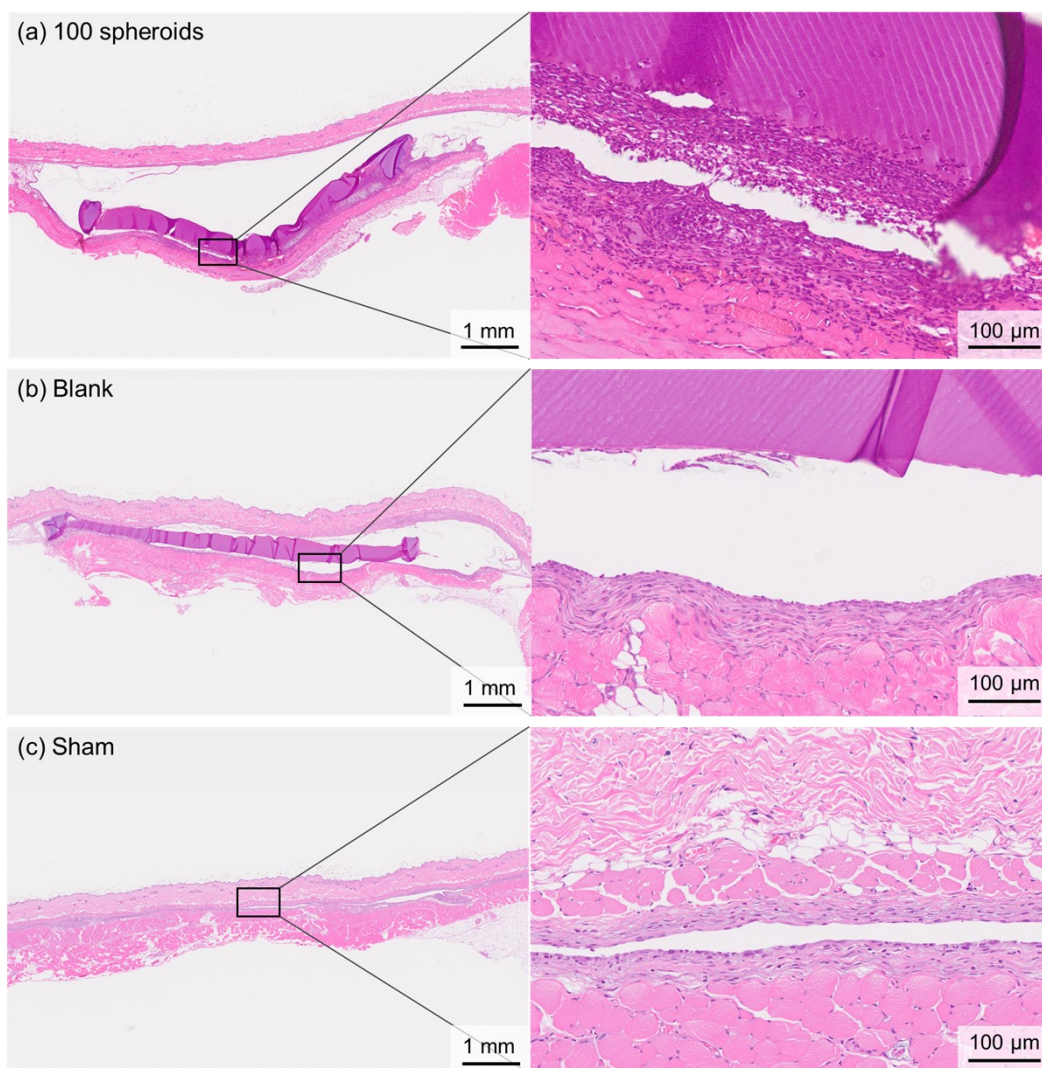

**Figure S4.** HE images of (a) the 100 spheroid device and (b) the blank device sandwiched between skin and fascia, and (c) a sham mouse at 7 days after transplantation.

**Table S1.** Details of the four animal groups and the sample number. +/- indicates the presence or absence of the device. “Spheroids” indicates the number of transplanted spheroids.

| Group name         | Device | Spheroids | Sample number |
|--------------------|--------|-----------|---------------|
| 1. Blank           | +      | 0         | 5             |
| 2. 2,000 spheroids | +      | 2,000     | 5             |
| 3. 100 spheroids   | +      | 100       | 5             |
| 4. Sham            | -      | 0         | 3             |
